# Supplementary material
Source: PubMed Central journal article supplement (PMC3310247)
Supplement: NIHMS362691-supplement-1_si_001.pdf [file NIHMS362691-supplement-1_si_001.pdf]

# End-Point Immobilization of Recombinant Thrombomodulin *via* Sortase-Mediated Ligation

Rui Jiang, Jacob Weingart, Hailong Zhang and Xue-Long Sun\*

## SUPPORTING INFORMATION

### 1. $^1\text{H}$ NMR and FTIR diGly-Biotin and diGly-Dansyl Spectrum Results

#### *diGly-Biotin*

$^1\text{H}$  NMR ( $\text{CD}_3\text{OD}$ ) d: 4.39 (m, 1 H,  $\text{CH-1-Biotin}$ ), 4.19 (m, 1 H,  $\text{CH-4-Biotin}$ ), 3.87 (s, 2H,  $\text{CH}_2\text{-Gly}$ ), 3.73 (s, 2H,  $\text{CH}_2\text{-Gly}$ ), 3.39 (t, 2H,  $\text{CH}_2\text{CH}_2$ ), 3.13 (t, 2H,  $\text{CH}_2\text{CH}_2$ ), 3.60 (dd, 1 H,  $\text{CH-Biotin}$ ), 2.91 (m, 1H,  $\text{CH-Biotin}$ ), 2.79 (dd, 1 H,  $\text{CH-Biotin}$ ), 2.60 (m 1 H,  $\text{CH-Biotin}$ ), 2.06 (t, 1 H,  $\text{CH}_2\text{CO-Biotin}$ ), 1.53, 1.43, 1.22 (m, 6 H,  $(\text{CH}_2)_3\text{-Biotin}$ ). FTIR ( $\text{cm}^{-1}$ ): 3290, 3075, 2922, 2852, 2689, 1667, 1541, 1463, 1259, 1090.

#### $^1\text{H}$ NMR

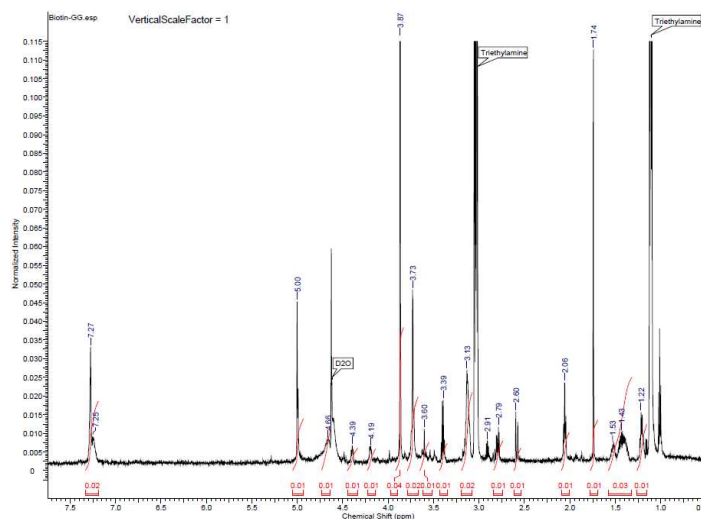

#### FTIR

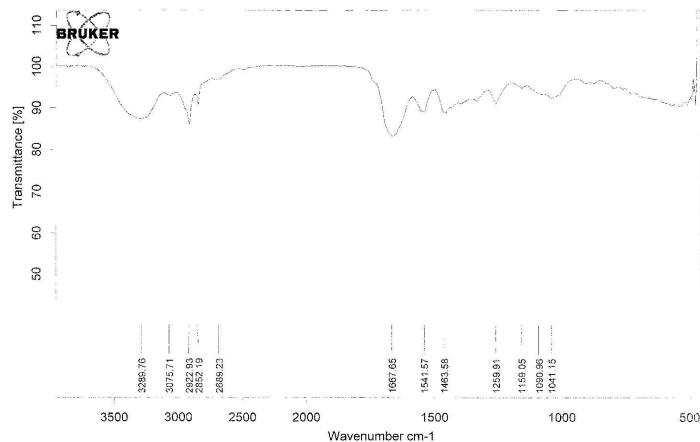

*diGly-Dansyl*

$^1\text{H NMR}$  ( $\text{D}_2\text{O}$ )  $\delta$ : 8.34 (d, 1H, aromatic), 8.09 (m, 2H, aromatic), 7.55 (m, 2H, aromatic), 7.26 (m, 1H, aromatic), 3.58 (s, 2H,  $\text{CH}_2\text{-Gly}$ ), 3.37 (s, 2H,  $\text{CH}_2\text{-Gly}$ ), 3.02 (t, 2H,  $\text{CH}_2\text{CH}_2$ ), 2.91 (t, 2H,  $\text{CH}_2\text{CH}_2$ ), 2.71 (s, 6H,  $\text{CH}_3\times 2$ ). FTIR ( $\text{cm}^{-1}$ ): 3254, 3067, 2941, 2869, 2833, 2788, 2390, 1650, 1572, 1454, 1308, 1139, 1091.

$^1\text{H NMR}$

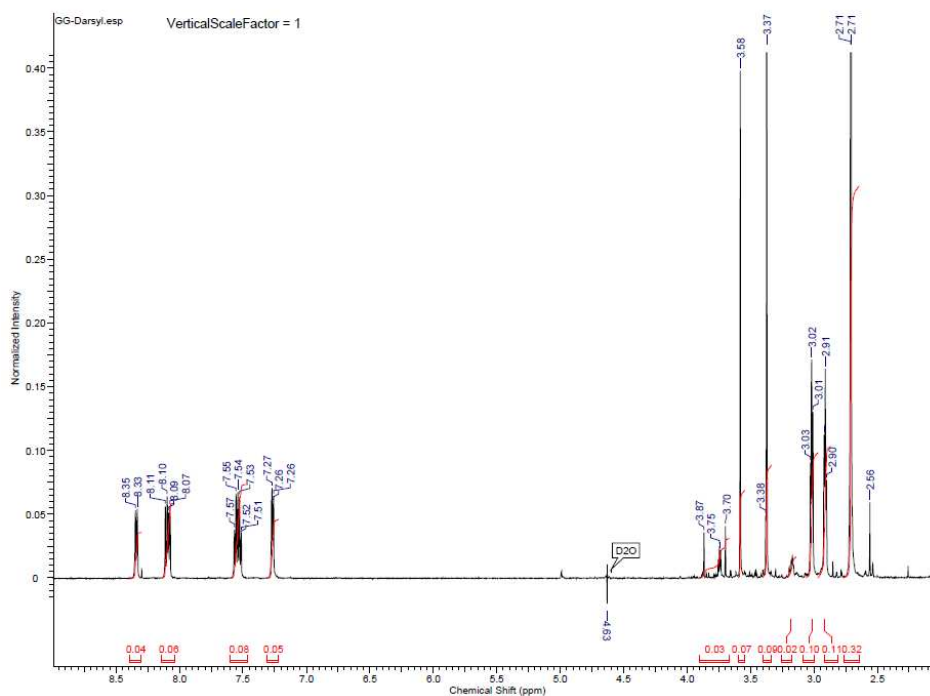

FTIR

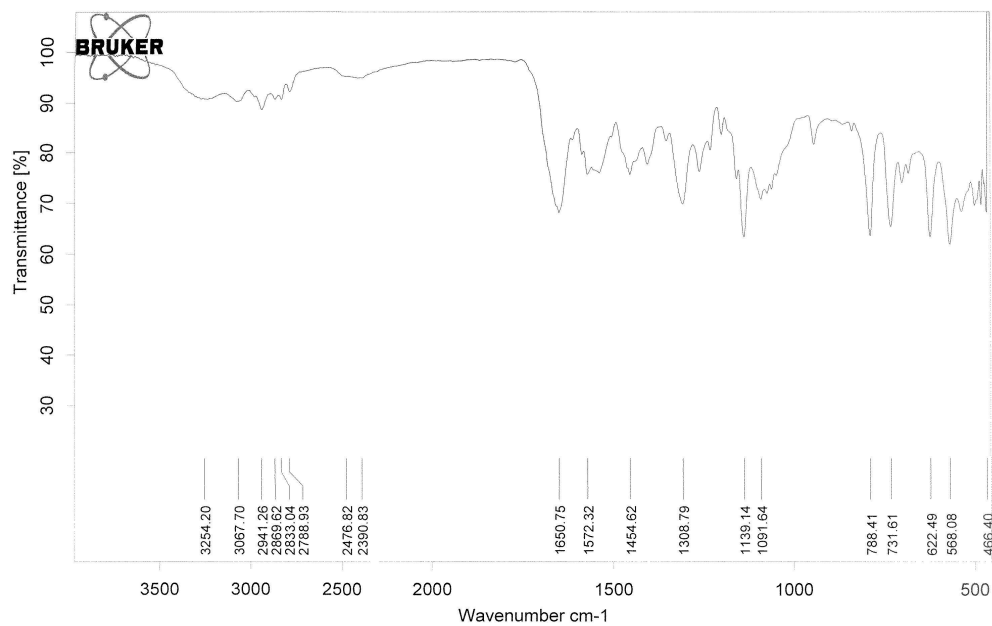

## 2. Full amino acid sequence of TM<sub>456</sub> fusion protein (dITM<sub>456</sub>)

**EGF4**  
GIEGRSVEPVDP**CFRANCEYQCQPLNQ**TSYLCVCAEGFAP**IPHEPHRCQLFCNQ**TACPADC  
**EGF5** **EGF6**  
DPNTQASCECPEGYILDDGF**ICTDIDE**CENGGF**CSGVCHNLP**GT**FEFECICG**PDSALAGQ**IGT**  
**DCDSGKVDGGDSGLPETGGSHHHHHH**

## 3. Enzymatic activity assay of recombinant SrtA

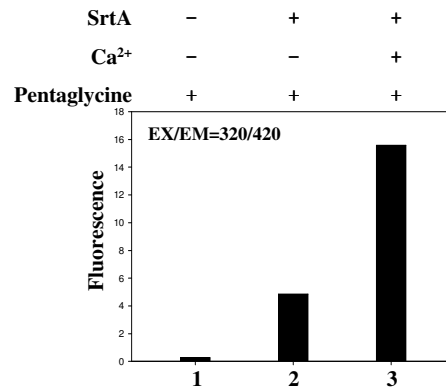

For activity determination, SrtA substrate Abz-LPETG-Lys (Dnp)-NH<sub>2</sub> (1 mM) from Anaspec was incubated with pentaglycine (2 mM) in assay buffer (20 mM Tris, 150 mM NaCl and 5 mM CaCl<sub>2</sub>, pH 8.0). Reactions were initiated by the addition of recombinant SrtA (1 μM) and were monitored by measuring the increase in fluorescence for 15 min (EX = 320 nm, EM = 420 nm, 37 °C).
